# Supplementary material
Source: HighWire-hosted journal article supplement (https://jnm.snmjournals.org/highwire/filestream/95229/field_highwire_adjunct_files/0/198184_Supplemental_Data.pdf)
Supplement: 198184_Supplemental_Data.pdf [file 198184_Supplemental_Data.pdf]

| TABLE 1. Summary of studies with imaging <24 hours to evaluate technical treatment success |                                     |                                                          |           |               |                  |                          |                          |                          |                          |                                |                                                  |                         |                                                  |                     |
|--------------------------------------------------------------------------------------------|-------------------------------------|----------------------------------------------------------|-----------|---------------|------------------|--------------------------|--------------------------|--------------------------|--------------------------|--------------------------------|--------------------------------------------------|-------------------------|--------------------------------------------------|---------------------|
| author                                                                                     | local therapy                       | tumor type                                               | nr of pts | study design  | baseline imaging | post-therapy timepoint 1 | post-therapy timepoint 2 | post-therapy timepoint 3 | post-therapy timepoint + | comparator imaging (criterion) | criteria for PET evaluation                      | clinical endpoint       | clinical outcome measure                         | QUADAS criteria met |
| Cornelis et al. J Nucl Med 2016                                                            | thermal ablation (RFA or microwave) | liver metastases from different primary tumors           | n=21      | retrospective | no               | immediate                | -                        | -                        | no                       | ceCT                           | visual, tissue radioactivity concentration (TRC) | 1-year tumor response   | follow-up, ceCT                                  | yes                 |
| Vandenbroucke et al. J Vasc Interv Radiol 2014                                             | RFA                                 | liver metastases                                         | n=20      | n/a           | no               | 24 hours                 | -                        | -                        | -                        | ceCT                           | visual, predefined patterns                      | tumor response          | follow-up, PET/CT                                | yes                 |
| Kuehl et al. Clin Oncol 2008                                                               | RFA                                 | liver metastases colorectal and hepatocellular carcinoma | n=55      | retrospective | yes              | <24 hours                | 1 month                  | 3 months                 | yes                      | ceCT                           | SUVmax, visual                                   | local tumor progression | histology, or ceCT and follow-up                 | yes                 |
| Kuehl et al. Eur J Radiol 2008                                                             | RFA                                 | liver metastases from colorectal cancer                  | n=16      | prospective   | yes              | <24 hours                | 4 weeks                  | 3 months                 | -                        | PET alone, MR                  | SUVmax, visual                                   | local tumor progression | histology, or ceCT and follow-up                 | yes                 |
| Ryan et al. Radiology 2013                                                                 | RFA                                 | liver metastases from different primary tumors           | n=23      | retrospective | yes              | immediate                | -                        | -                        | -                        | no                             | visual                                           | local tumor progression | most recently available follow-up CT, MR, or PET | yes                 |

| TABLE 2. Main results of studies with imaging <48 hours to evaluate technical treatment success |                                     |                                                          |           |                                                                                                                                                                                                                                                                                                                                                               |                     |
|-------------------------------------------------------------------------------------------------|-------------------------------------|----------------------------------------------------------|-----------|---------------------------------------------------------------------------------------------------------------------------------------------------------------------------------------------------------------------------------------------------------------------------------------------------------------------------------------------------------------|---------------------|
| author                                                                                          | local therapy                       | tumor type                                               | nr of pts | main results/conclusion                                                                                                                                                                                                                                                                                                                                       | QUADAS criteria met |
| Cornelis et al. J Nucl Med 2016                                                                 | thermal ablation (RFA or microwave) | liver metastases from different primary tumors           | n=21      | 11 of the 25 tumors recurred within 1 year. The accuracy of the qualitative analysis of FDG PET was 92% (23/25) (P < 0.001), and the area under the ROC curve was 0.929 (95% CI, 0.740-0.990). Immediate PET/CT accurately predicts the success of liver metastasis ablation at 1 year and is superior to immediate contrast enhanced CT.                     | yes                 |
| Vandenbroucke et al. J Vasc Interv Radiol 2014                                                  | RFA                                 | liver metastases                                         | n=20      | Nodular enhancement and rim-like enhancement together had the highest sensitivity to detect viable tumor localisation (63% and 48% respectively). Nodular enhancement had the highest specificity.                                                                                                                                                            | yes                 |
| Kuehl et al. Clin Oncol 2008                                                                    | RFA                                 | liver metastases colorectal and hepatocellular carcinoma | n=55      | 35/78 tumors showed local tumor progression (LTP) There was no significant difference in the mean time until the detection of local tumor progression: 4.1 ± 3 months when PET/CT was used and 5.85 ± 4.6 months when using contrast-enhanced computed tomography (P > 0.11). PET/CT supports RFA by early identification of residual tumor or LTP.           | yes                 |
| Kuehl et al. Eur J Radiol 2008                                                                  | RFA                                 | liver metastases from colorectal cancer                  | n=16      | The accuracy and sensitivity for tumor detection was 86% and 76% for PET alone, 91% and 83% for PET/CT and 92% and 75% for MRI, respectively. In comparison to PET alone, PET/CT was significantly better for detecting LTP after RFA. There were no significant differences between MRI and PET/CT, but these preliminary results need further verification. | yes                 |
| Ryan et al.                                                                                     | RFA                                 | Liver metastases from different primary tumors           | n=23      | 28 (97%) of the ablated lesions showed no residual FDG activity directly after RFA. One patient with residual activity underwent immediate biopsy that revealed residual viable tumor and was immediately re-treated. Follow-up imaging showed local recurrences in two (7%) lesions that were negative at PET immediately after ablation.                    | yes                 |

| <b>TABLE 3.</b> Summary of studies with imaging to evaluate treatment efficacy |                                           |                                         |           |               |                  |                          |                          |                          |                          |                                |                             |                                    |                            |                     |
|--------------------------------------------------------------------------------|-------------------------------------------|-----------------------------------------|-----------|---------------|------------------|--------------------------|--------------------------|--------------------------|--------------------------|--------------------------------|-----------------------------|------------------------------------|----------------------------|---------------------|
| author                                                                         | local therapy                             | tumor type                              | nr of pts | study design  | baseline imaging | post-therapy timepoint 1 | post-therapy timepoint 2 | post-therapy timepoint 3 | post-therapy timepoint + | comparator imaging (criterion) | criteria for PET evaluation | clinical endpoint                  | clinical outcome measure   | QUADAS criteria met |
| <b>indication: RFA and cryoablation in liver metastases</b>                    |                                           |                                         |           |               |                  |                          |                          |                          |                          |                                |                             |                                    |                            |                     |
| Joosten et al. Eur J Surg Oncol 2005                                           | RFA and cryo-ablation w/ or w/o resection | liver metastases from colorectal cancer | n=43      | retrospective |                  | <3 weeks                 | 6 weeks                  | 3 months                 | yes                      | ceCT                           | visual                      |                                    | follow-up                  | yes                 |
| Langenhoff et al. J Clin Oncol 2002                                            | RFA and cryo-ablation w/ or w/o resection | liver metastases from colorectal cancer | n=23      | prospective   | yes              | <3 weeks                 | 6 weeks                  | 3 months                 | 6 months                 | ceCT                           | visual                      | local recurrence                   | follow-up and tumor marker | yes                 |
| Donckier et al. J Surg Oncol 2003                                              | RFA                                       | liver metastases                        | n=17      | prospective   | yes              | 1 week                   | 1 month                  | 3 months                 | yes                      | ceCT                           | visual                      | local recurrence                   | follow-up and/or histology | yes                 |
| Chen et al. Ann Nucl Med 2013                                                  | RFA                                       | primary liver tumor or metastases       | n=28      | retrospective | no               | <8 weeks                 | -                        | -                        | -                        | ceCT, MR                       | visual                      | local recurrence                   | follow-up, ceCT, PET, MR   | yes                 |
| Nielsen et al Eur J Radiol 2013                                                | RFA                                       | liver metastases from colorectal cancer | n=79      | retrospective | Yes              | <1 year                  | -                        | -                        | -                        | ceCT                           | Visual                      | local recurrence                   | ceCT                       | no                  |
| Sahin et al. Ann Surg Oncol 2012                                               | RFA                                       | liver metastases from                   | n=104     | retrospective | yes              | variable (median 12      | -                        | -                        | -                        | ceCT                           | not specified               | local recurrence, overall survival | ceCT, follow-up            | no                  |

|                                                          |     |                                                 |      |                |     |               |                 |            |     |               |                            |                           |                 |     |
|----------------------------------------------------------|-----|-------------------------------------------------|------|----------------|-----|---------------|-----------------|------------|-----|---------------|----------------------------|---------------------------|-----------------|-----|
|                                                          |     | colorectal cancer                               |      |                |     | months )      |                 |            |     |               |                            |                           |                 |     |
| <b>indication: RFA and cryoablation for lung lesions</b> |     |                                                 |      |                |     |               |                 |            |     |               |                            |                           |                 |     |
| Yoo et al. Am J Roentgenol 2011                          | RFA | irresectable primary non-small cell lung cancer | n=30 |                | yes | 4 days (n=26) | 6 months (n=23) | -          | no  | no            | SUVmax                     | 1-year clinical event     | follow-up, ceCT | Yes |
| Lafuente et al. Rev Esp Med Nucl Imagen Mol 2016         | RFA | lung metastases colorectal cancer               | n=18 | pro-spective   | yes | 1 month       | 3 months        | -          | -   | no            | SUVmax and retention index | local recurrence          | histology       | No  |
| Deandreis et al. Radiology 2011                          | RFA | lung carcinoma or lung metastases               | n=34 | pro-spective   | yes | (24 hrs)      | 1 month         | 3 months   | yes | ceCT          | SUVmax, visual             | local recurrence          | follow-up       | Yes |
| Higuchi et al. J Cancer Res Clin Oncol 2014              | RFA | lung carcinoma or lung metastases               | n=20 | pro-spective   | yes | 7-14 days     | 3-6 months      | -          | -   | ceCT (RECIST) | visual                     | local recurrence, 2-yr OS |                 | Yes |
| Higaki et al. Ann Nucl Med 2008                          | RFA | lung carcinoma or lung metastases               | n=15 | pro-spective   | yes | 0-3 months    | 3-6 months      | 6-9 months | -   | ceCT          | SUVmax                     |                           | follow-up       | Yes |
| Alafate et al. Acta Med Okayama 2013                     | RFA | lung cancer or lung metastases                  | n=25 | retro-spective | Yes | 3 months      | 6 months        | -          | -   | ceCT          | SUVmax                     | tumor response            | follow-up       | No  |
| Wang et al. Int J Clin Exp Med 2015                      | RFA | lung metastases from - lung carcinoma           | 58   | pro-spective   | Yes | 3 months      | 9 months        | 12 months  | yes | ceCT          | SUVmax                     | local recurrence          | follow-up       | Yes |
| Bonichon et al. Eur J Nucl Med Mol                       | RFA | lung metastases                                 | n=89 | pro-spective   | Yes | 3 months      | -               | -          | -   | ceCT          | SUVmax                     | local recurrence          | ceCT            | yes |

|                                                                          |                                         |                                   |                            |               |                    |                                    |             |           |           |                |                |                                       |                                      |     |
|--------------------------------------------------------------------------|-----------------------------------------|-----------------------------------|----------------------------|---------------|--------------------|------------------------------------|-------------|-----------|-----------|----------------|----------------|---------------------------------------|--------------------------------------|-----|
| Imaging 2013                                                             |                                         |                                   |                            |               |                    |                                    |             |           |           |                |                |                                       |                                      |     |
| Singnurkar et al. J Nucl Med 2010                                        | RFA                                     | lung carcinoma or lung metastases | n=68 (56 adequate imaging) | retrospective | Yes                | 1-4 months                         | 6-12 months | -         | -         | ceCT           | SUVmax, visual | local recurrence                      | follow-up                            | No  |
| Suzawa et al. Clin Nucl Med 2013                                         | RFA                                     | lung carcinoma or lung metastases | n=143                      | retrospective | No                 | 3 months                           | 6 months    | 9 months  | yes       | ceCT           | SUVmax         | local recurrence                      | follow-up, histology                 | Yes |
| LoGiurato et al. Nucl Med Commun 2015                                    | cryoablation                            | non-small cell lung cancer        | n=28                       | retrospective | yes (n=19 lesions) | 6 months (n=23) or 12 months (n=4) | 12 months   | 18 months | 24 months | CT             | SUVmax         | local recurrence                      | PET/CT and CT                        | Yes |
| <b>indication: regional ablative therapy in hepatocellular carcinoma</b> |                                         |                                   |                            |               |                    |                                    |             |           |           |                |                |                                       |                                      |     |
| Higashi et al. Eur J Nucl Med Mol Imaging 2010                           | TACE, TAC, RFA or systemic chemotherapy | hepatocellular carcinoma          | n=60 -                     | retrospective | yes                | <1 month                           | -           | -         | -         | no             | SUVmax, visual |                                       | follow-up, tumor markers             | No  |
| Sabet et al. Nuklearmedizin 2014                                         | Y-90 microspheres                       | hepatocellular carcinoma          | n=33                       | retrospective | yes                | 4 weeks                            | -           | -         | -         | no             | SUVmax         | overall survival                      | follow-up                            | Yes |
| Ma et al. Theranostics 2014                                              | TACE                                    | hepatocellular carcinoma          | n=27                       | retrospective | Yes                | 4-6 weeks                          | -           | -         | -         | ceCT (mRECIST) | SUVmax         | overall survival, time to progression | follow-up, ceCT                      | Yes |
| Kim et al. Nucl Med Mol Imaging 2012                                     | RFA, TACE or ethanol injection          | hepatocellular carcinoma          | n=31                       | retrospective | no                 | <1 month                           | -           | -         | -         | no             | SUVmax, visual | local recurrence                      | follow-up with ceCT and tumor marker | No  |
| Paudyal et al.                                                           | RFA                                     | hepato-                           | n=24                       | pro-          | yes                | 3 months                           | 6           | 9 months  | yes       | ceCT           | SUVmax         | local                                 | follow-                              | yes |

|                                                          |                                 |                                                                       |      |                |     |                                                                 |         |         |     |                              |                                     |                                                 |                                 |     |
|----------------------------------------------------------|---------------------------------|-----------------------------------------------------------------------|------|----------------|-----|-----------------------------------------------------------------|---------|---------|-----|------------------------------|-------------------------------------|-------------------------------------------------|---------------------------------|-----|
| Oncol Rep 2007                                           |                                 | cellular carcinoma                                                    |      | spective       |     |                                                                 | months  |         |     |                              | ax                                  | recurrence                                      | up                              |     |
| Li et al. Eur J Nucl Med Mol Imaging 2017                | TACE (+/- bevacizumab)          | hepato-cellular carcinoma                                             | n=22 | pro-spective   | yes | 10 weeks                                                        |         |         |     | 11C-Acetate PET, CT (RECIST) | Metabolic response                  | overall survival                                | follow-up                       | Yes |
| Cascales-Campo et al. Transplant Proc 2015               | TACE                            | hepato-cellular carcinoma undergoing orthotopic liver transplantation | n=20 | retro-spective | yes | Variable interval after TACE (<8 weeks before liver transplant) | -       | -       | -   | No                           | SUVmax                              | tumor response, survival rate 1-year and 3-year | histology, follow-up            | No  |
| Song et al. Clin Radiol 2015                             | TACE                            | hepato-cellular carcinoma                                             | n=73 | retro-spective | no  | variable (mean 41 days)                                         | -       | -       | -   | ceCT                         | ratio SUVmax tumor to SUVmean liver | treatment success, overall survival             | follow-up, ceCT, tumor marker   | No  |
| Wang et al. J Dig Dis 2013                               | status after surgery and/or RFA | recurrence of hepato-cellular carcinoma                               | n=36 | pro-spective   | no  | varying <2-3 months                                             | -       | -       | -   | ceUS                         | visual                              | local recurrence                                | biomarker, histology, follow-up | Yes |
| <b>indication: radioembolisation in liver metastases</b> |                                 |                                                                       |      |                |     |                                                                 |         |         |     |                              |                                     |                                                 |                                 |     |
| Miller et al. Am J Roentgenol 2007                       | Y-90 microspheres               | liver metastases from different primary tumors                        | n=23 | retro-spective | yes | <30 days                                                        | 60 days | 90 days | yes | CT (WHO, RECIST, necrosis)   | visual                              | tumor respons                                   | follow-up                       | Yes |

|                                                       |                            |                                                         |      |                    |     |                   |                               |                    |     |                               |                                                                          |                                            |                                   |     |
|-------------------------------------------------------|----------------------------|---------------------------------------------------------|------|--------------------|-----|-------------------|-------------------------------|--------------------|-----|-------------------------------|--------------------------------------------------------------------------|--------------------------------------------|-----------------------------------|-----|
| Gulec et al.<br>Eur J Nucl<br>Med Mol<br>Imaging 2011 | Y-90 resin<br>microspheres | liver<br>metastases<br>from<br>colorectal<br>cancer     | n=20 | pro-<br>spective   | yes | 4 weeks           | -                             | -                  | -   | no                            | function<br>al<br>tumor<br>volume<br>, TLG                               | overall survival                           | follow-<br>up                     | Yes |
| Sabet et al.<br>Eur J Nucl<br>Med Mol<br>Imaging 2015 | Y-90<br>microspheres       | liver<br>dominant<br>metastatic<br>colorectal<br>cancer | n=51 | retro-<br>spective | yes | 4 weeks           | -                             | -                  | -   | no                            | SUVm<br>ax,<br>ratio<br>SUVm<br>ax to<br>liver<br>(>50%<br>decrea<br>se) | overall survival                           | follow-<br>up                     | Yes |
| Kalva et al.<br>Am J Clin<br>Oncol 2017               | Y-90 micro-<br>spheres     | liver<br>metastases<br>from<br>colorectal<br>cancer     | n=45 | retro-<br>spective | yes | 45 days<br>(n=35) | 6<br>mont<br>hs               | 9 months           | yes | ceCT<br>and/or MR<br>(RECIST) | PERCI<br>ST                                                              | overall survival                           | follow-<br>up                     | No  |
| Fendler et al.<br>J Nucl Med<br>2013                  | Y-90 micro-<br>spheres     | liver<br>metastases<br>from<br>colorectal<br>cancer     | n=80 | pro-<br>spective   | yes | 3 months          | -                             | -                  | -   | ceCT<br>(RECIST<br>1.1)       | MTV,<br>TLG,<br>SUVm<br>ax,<br>SUVpe<br>ak                               | overall survival                           | follow-<br>up                     | Yes |
| Fendler et al.<br>J Nucl Med<br>2016                  | Y-90 micro-<br>spheres     | liver<br>metastases<br>from breast<br>cancer            | n=81 | retro-<br>spective | yes | 3 months          | 6<br>mont<br>hs<br>(n=3<br>0) | 9 months<br>(n=30) | yes | no                            | SUVm<br>ax<br>(>30%<br>decrea<br>se)                                     | treatment<br>response,<br>overall survival | follow-<br>up,<br>tumor<br>marker | Yes |
| Haug et al. J<br>Nucl Med<br>2012                     | Y-90 micro-<br>spheres     | liver<br>metastases<br>from breast<br>cancer            | n=58 |                    | yes | 3 months          | -                             | -                  | -   | ceCT and<br>MR<br>(RECIST)    | SUVm<br>ax<br>(PERC<br>IST)                                              | overall survival                           | follow-<br>up                     | No  |
| Michl et al. J<br>Nucl Med<br>2016                    | Y-90 micro-<br>spheres     | liver<br>metastases<br>from                             | n=17 | retro-<br>spective | yes | 3 months          | -                             | -                  | -   | ceCT<br>(RECIST)              | SUVpe<br>ak,<br>TLG                                                      | overall<br>survival,<br>progression        | follow-<br>up,<br>ceCT/M          | yes |

|                                                |                   |                                                |      |               |                        |                |             |            |     |                     |                        |                                                 |                                          |     |
|------------------------------------------------|-------------------|------------------------------------------------|------|---------------|------------------------|----------------|-------------|------------|-----|---------------------|------------------------|-------------------------------------------------|------------------------------------------|-----|
|                                                |                   | pancreatic cancer                              |      |               |                        |                |             |            |     |                     | (PERCIST)              | free survival, intrahepatic progression         | R, tumor markers                         |     |
| Sofocleous et al. Clin Colorectal Cancer 2014  | Y-90 microspheres | liver metastases from colorectal cancer        | n=19 | prospective   | yes, in 15/19 patients | 4-8 weeks      | 3-4 months  | 5-6 months | yes | ceCT (RECIST)       | PERCIST                | liver-PFS, PFS, OS                              | follow-up, ceCT or MR, and tumor markers | Yes |
| Sofocleous et al. Clin Colorectal Cancer 2015  | Y-90 microspheres | liver metastases from colorectal cancer        | n=53 | retrospective | yes                    | 4-8 weeks      | 12-16 weeks | -          | -   | ceCT (RECIST)       | SUVmax (PERCIST)       | tumor response                                  | follow-up                                | No  |
| Szysko et al. Nucl Med Commun 2007             | Y-90 microspheres | liver metastases different primary tumors      | n=21 | prospective   | yes                    | 6 weeks        | 6 months    | 12 months  | -   | ceCT (RECIST)       | SUVmax                 | tumor response                                  | follow-up, ceCT                          | Yes |
| Zerizer et al. Eur J Nucl Med Mol Imaging 2012 | Y-90 microspheres | liver metastases from colorectal cancer        | n=25 | prospective   | yes                    | 6-8 weeks      | -           | -          | -   | ceCT (RECIST, Choi) | EORTC criteria         | 2-year PFS (excluding extrahepatic progression) | follow-up, tumor markers                 | Yes |
| Bagni et al. Cancer Biother Radiopharm 2015    | Y-90 microspheres | liver metastases from breast cancer            | n=17 | prospective   | yes                    | 6 weeks        | -           | -          | no  | no                  | TLG (>50% decrease)    | overall survival                                | follow-up                                | Yes |
| Barabasch et al. Invest Radiol 2015            | Y-90 microspheres | liver metastases from different primary tumors | n=35 | prospective   | yes                    | 6 weeks (n=31) | -           | -          | -   | MRI (ADCmin)        | SUVmax (>30% decrease) | tumor response                                  | follow-up, MRI                           | Yes |
| Kucuk et al. Worl J Surg                       | Y-90 microspheres | liver metastases                               | n=78 | retrospective | yes                    | 6 weeks        | 12 week     | 18 weeks   | yes | no                  | SUVmax                 | treatment response                              | follow-up                                | yes |



|                                                                      |                   |                                          |      |               |     |                             |                                  |     |     |                     |                                  |                                 |           |     |
|----------------------------------------------------------------------|-------------------|------------------------------------------|------|---------------|-----|-----------------------------|----------------------------------|-----|-----|---------------------|----------------------------------|---------------------------------|-----------|-----|
| Oncol 2011                                                           |                   | from different primary tumors            |      |               |     |                             | s                                |     |     |                     | (>20% decrease)                  |                                 |           |     |
| Willowson et al. EJNMMI res 2017                                     | Y-90 microspheres | liver metastases from colorectal cancer  | n=22 | retrospective | yes | <8 weeks                    | -                                | -   | -   | no                  | delta-TLG (50% decrease) SUVpeak | overall survival                | follow-up | Yes |
| Edalat et al. Clin Nucl Med 2016                                     | Y-90 microspheres | liver metastases colorectal cancer       | n=16 | retrospective | yes | 0.9-5.7 months              | n/a                              | n/a | n/a | ceCT and/or MR      | PERCIST, TLG, SUVpeak, SAM       | overall survival                | follow-up | No  |
| Shady et al. Eur J Rad 2016                                          | Y-90 microspheres | liver metastases from colorectal cancer  | n=49 | retrospective | yes | 3-11 weeks (median 6 weeks) |                                  |     |     |                     | SUVmax, SUVpeak, MTP and TLG     | overall survival                | follow-up | yes |
| Shady et al. AJR 2016                                                | Y-90 microspheres | liver metastases from colorectal cancer  | n=25 | retrospective | yes | 4-8 weeks                   | every 2 months until progression |     |     | ceCT (RECIST, Choi) | EORTC criteria                   | liver progression free survival | follow-up | yes |
| <b>indication: radioembolisation for cholangiocellular carcinoma</b> |                   |                                          |      |               |     |                             |                                  |     |     |                     |                                  |                                 |           |     |
| Haug et al. Eur J Nucl Med Mol Imaging 2011                          | Y-90 microspheres | intrahepatic cholangiocellular carcinoma | n=26 | prospective   | Yes | 3 months                    | -                                | -   | -   | no                  | delta-SUVmax, delta-             | overall survival                | follow-up | Yes |

|                                         |                   |                                                     |      |                  |     |         |                 |          |          |    |                                |  |               |     |
|-----------------------------------------|-------------------|-----------------------------------------------------|------|------------------|-----|---------|-----------------|----------|----------|----|--------------------------------|--|---------------|-----|
|                                         |                   |                                                     |      |                  |     |         |                 |          |          |    | SUVmean,<br>deltaMTV           |  |               |     |
| Filippi et al.<br>Nucl Med<br>Biol 2015 | Y-90 microspheres | intrahepatic<br>cholangio-<br>cellular<br>carcinoma | n=17 | pro-<br>spective | Yes | 6 weeks | 3<br>mont<br>hs | 6 months | 9 months | no | delta-<br>TLG<br>(PERC<br>IST) |  | follow-<br>up | Yes |

| <b>TABLE 4.</b> Main results of studies with imaging at early and late time points to evaluate treatment efficacy |                                          |                                         |           |                                                                                                                                                                                                                                                                                                                                                                                                                                                                                                  |                     |
|-------------------------------------------------------------------------------------------------------------------|------------------------------------------|-----------------------------------------|-----------|--------------------------------------------------------------------------------------------------------------------------------------------------------------------------------------------------------------------------------------------------------------------------------------------------------------------------------------------------------------------------------------------------------------------------------------------------------------------------------------------------|---------------------|
| Author                                                                                                            | local therapy                            | tumor type                              | nr of pts | Main results/ conclusion                                                                                                                                                                                                                                                                                                                                                                                                                                                                         | QUADAS criteria met |
| <b>indication: RFA and cryoablation in liver metastases</b>                                                       |                                          |                                         |           |                                                                                                                                                                                                                                                                                                                                                                                                                                                                                                  |                     |
| Joosten et al. Eur J Surg Oncol 2005                                                                              | RFA and cryoablation w/ or w/o resection | liver metastases from colorectal cancer | n=43      | In a subgroup analysis on 43 patients with 104 ablated lesions, CT scan immediate after treatment was not able to predict local treatment failure, whereas FDG-PET scan within 3 weeks after local ablative treatment predicted 6/7 local recurrences.                                                                                                                                                                                                                                           | yes                 |
| Langenhoff et al. J Clin Oncol 2002                                                                               | RFA and cryoablation w/ or w/o resection | liver metastases from colorectal cancer | n=23      | 51 lesions became photopenic on FDG-PET, while 5 lesions showed persistent activity on FDG-PET. In 4/5 FDG-PET-positive lesions, a local recurrence developed during follow-up; one FDG-PET-positive lesion turned out to be an abscess. None of the FDG-PET-negative lesions developed a local recurrence during follow-up. FDG-PET showed all 9 cases with extra-hepatic recurrence. Detection of recurrence by FDG-PET was considerably earlier than the detection by CT.                     | yes                 |
| Donckier et al. J Surg Oncol 2003                                                                                 | RFA                                      | liver metastases                        | n=17      | In four patients, FDG-PET at 1 week and 1 month showed peripheral hypermetabolic residue after RFA, whereas CT did not revealed residual tumor. In three patients, local persistence of viable tumor cells was biopsy-proven at reintervention. In the fourth, follow-up CT showed subsequent development of a local recurrence. FDG-PET accurately monitors the local efficacy of RFA for treatment of liver metastases, as it early recognizes incomplete tumor ablation, not detectable on CT | yes                 |
| Chen et al. Ann Nucl Med 2013                                                                                     | RFA                                      | primary liver tumor or metastases       | n=28      | PET identified 16 out of 17 recurrent/residual tumors with a sensitivity of 94.1 %, specificity 81.3%. Sensitivity of CT and MRI 66.7%, specificity 62,5 and 87,5% respectively. The study suggests that FDG-PET is superior to MRI and/or CT and is more cost-effective in post RFA hepatic tumor assessment.                                                                                                                                                                                   | yes                 |
| Nielsen et al Eur J Radiol 2013                                                                                   | RFA                                      | liver metastases from colorectal cancer | n=79      | Regular follow-up using FDG PET-CT within this period is advised, so repeated treatment can be initiated. Rim-shaped uptake may be present until 4-6 months, complicating evaluation. The benefit in the follow-up of lesions <2 cm may be limited.                                                                                                                                                                                                                                              | no                  |
| Sahin et al. Ann Surg Oncol 2012                                                                                  | RFA                                      | liver metastases from colorectal cancer | n=104     | PET/CT findings were equivalent to ce CT in 55 patients (67%), superior in 22 (27%), and inferior in 5 (6%). Pre-RFA or post-RFA PET imaging did not affect overall survival. PET/CT was superior to ce CT in demonstrating recurrence after RFA in about a quarter of the patients with CLM.                                                                                                                                                                                                    | no                  |

| <b>indication: RFA and cryoablation for lung lesions</b> |     |                                                 |      |                                                                                                                                                                                                                                                                                                                                                                                                                                                                                                                                                     |     |
|----------------------------------------------------------|-----|-------------------------------------------------|------|-----------------------------------------------------------------------------------------------------------------------------------------------------------------------------------------------------------------------------------------------------------------------------------------------------------------------------------------------------------------------------------------------------------------------------------------------------------------------------------------------------------------------------------------------------|-----|
| Yoo et al. Am J Roentgenol 2011                          | RFA | irresectable primary non-small cell lung cancer | n=30 | Patients with a complete metabolic response at early PET/CT had a 1-year event rate of 43%, whereas those with partial or no response or disease progression had a 1-year event rate of 67% (p = 0.27). Patients with a complete metabolic response at 6-month PET/CT had a 1-year event rate of 0%. Those with a partial response and those with disease progression had an overall event rate of 75% (p = 0.001)<br>Early post-RFA PET/CT is not necessary and 6-month post-RFA PET/CT findings correlate better with clinical outcome at 1 year. | yes |
| Lafuente et al. Rev Esp Med Nucl Imagen Mol 2016         | RFA | lung metastases colorectal cancer               | n=18 | The retention index (dual time point PET) at 1 month after RFA showed a sensitivity and specificity of 83% and 92%, respectively.<br>Dual time point PET/CT can predict the outcome at one month after RFA in lung metastases from digestive tract cancers. The retention index can be used to indicate the need for further procedures to rule out persistent tumor due to incomplete RFA.                                                                                                                                                         | no  |
| Deandreis et al. Radiology 2011                          | RFA | lung carcinoma or lung metastases               | n=34 | Within 3 months after RF ablation, incomplete treatment was diagnosed in four of 28 patients (14%, three at 1 month and one at 3 months). Findings of FDG PET/CT were true positive in four, false positive in one, and true negative in 23 patients. Findings of chest CT were true positive in one, false positive in one, false negative in three, and true negative in 23 patients.                                                                                                                                                             | yes |
| Higuchi et al. J Cancer Res Clin Oncol 2014              | RFA | lung carcinoma or lung metastases               | n=20 | The FDG-PET results 7-14 days after RFA did not predict recurrence, whereas positive findings 3-6 months after RFA significantly correlated with local recurrence (p = 0.0016)<br>We confirmed the effectiveness of RFA for unresectable primary and secondary thoracic malignancies. FDG-PET analysis 3-6 months after ablation is a useful tool to assess local control.                                                                                                                                                                          | yes |
| Higaki et al. Ann Nucl Med 2008                          | RFA | lung carcinoma or lung metastases               | n=15 | Of 60 tumors, 10 showed local progression. The area under the ROC curve (AUC) for the 6-9 months (P = 0.044) was the largest and almost equal to that of the 3-6 months (P = 0.024). AUC for the 0-3 months was the smallest and statistically insignificant (P = 0.705). The cutoff value of 1.5 of SUVmax at 3-9 months after RFA showed 77.8% sensitivity and 85.7-90.5% specificity.<br>The appropriate follow-up initiation time point is at least 3 months following RFA.                                                                     | yes |
| Alafate et al. Acta Med Okayama 2013                     | RFA | lung cancer or lung metastases                  | n=25 | SUVmax was more reliable than the size measurements by CT in the first 6 months after RFA, and PET/CT at 6 months post-RFA may be more appropriate for the assessment of FDG accumulation than that at 3 months post-RFA.                                                                                                                                                                                                                                                                                                                           | no  |
| Wang et al. Int J Clin Exp Med 2015                      | RFA | lung metastases from - lung carcinoma           | n=58 | Increased metabolic activity, new uptake of FDG, and irregular or nodular high uptake of FDG (maximum standard uptake value (SUVmax) $\geq 3$ ) of the ablated zone after 3 months were all findings concerning recurrence or residual.                                                                                                                                                                                                                                                                                                             | yes |
| Bonichon et al. Eur J Nucl                               | RFA | lung metastases                                 | n=89 | PET/CT at 3 months and the reference standard were available in 77 patients and 100 lesions. Accuracy was 66.00% (95% CI 55.85-75.18%), sensitivity 90.91% (95% CI 58.72-99.77%),                                                                                                                                                                                                                                                                                                                                                                   | yes |

|                                                                          |                                          |                                   |                            |                                                                                                                                                                                                                                                                                                                                                                                                                                                     |     |
|--------------------------------------------------------------------------|------------------------------------------|-----------------------------------|----------------------------|-----------------------------------------------------------------------------------------------------------------------------------------------------------------------------------------------------------------------------------------------------------------------------------------------------------------------------------------------------------------------------------------------------------------------------------------------------|-----|
| Med Mol Imaging 2013                                                     |                                          |                                   |                            | specificity 62.92% (95% CI 52.03-72.93%), PPV 23.26% (95% CI 11.76-38.63%), and NPV 98.25% (95% CI 90.61-99.96%).<br>The specificity of PET/CT at 3 months is low. It is useful for its negative predictive value, but positive findings need to be confirmed.                                                                                                                                                                                      |     |
| Singnurkar et al. J Nucl Med 2010                                        | RFA                                      | lung carcinoma or lung metastases | n=68 (56 adequate imaging) | Post-RFA factors that related to reduced recurrence-free survival included an unfavorable uptake pattern (P < 0.01), post-RFA SUV (P < 0.01), and an increase in SUV over time after ablation (P = 0.05).                                                                                                                                                                                                                                           | no  |
| Suzawa et al. Clin Nucl Med 2013                                         | RFA                                      | lung carcinoma or lung metastases | n=143                      | The area under the ROC curve of PET was higher than that of CT at all 4 time points (0.71 vs 0.55 at 3 months, 0.82 vs 0.60 at 6 months, 0.84 vs 0.66 at 9 months, and 0.92 vs 0.68 at 12 months), and its diagnostic performance was significant at each time point (P = 0.0010 at 3 months and P < 0.001 at 6, 9, and 12 months).<br>FDG PET/CT is better able to assess local tumor progression at 3 and 6 months after lung RFA than CT alone.  | yes |
| LoGiurato et al. Nucl Med Commun 2015                                    | cryoablation                             | non-small cell lung cancer        | n=28                       | FDG PET-CT is a valuable tool for determining treatment response and for distinguishing benign from malignant lesions after cryoablation. The CT area was most predictive of future recurrence at baseline, whereas SUVmax more than or equal to 2.5 was most predictive of future recurrence at first follow-up.                                                                                                                                   | yes |
| <b>indication: regional ablative therapy in hepatocellular carcinoma</b> |                                          |                                   |                            |                                                                                                                                                                                                                                                                                                                                                                                                                                                     |     |
| Higashi et al. Eur J Nucl Med Mol Imaging 2010                           | TACE, TAC, RFA or systemic chemo-therapy | hepato-cellular carcinoma         | n=60                       | Visual PET diagnosis of post-therapeutic lesions was a good predictor of overall survival of unresectable HCC patients. The low FDG group showed significantly longer survival (average: 608 days) than that (average: 328 days) of the high FDG group (p < 0.0001).                                                                                                                                                                                | no  |
| Sabet et al. Nuklearmedizin 2014                                         | Y-90 microspheres                        | hepato-cellular carcinoma         | n=33                       | FDG-negative patients had a significantly longer OS (13 months, 95%CI 7-19) than FDG-positive patients (9 months, 95%CI 7-11; p = 0.010). Among FDG-positive patients, metabolic responders survived significantly longer than metabolic non-responders (10 months, 95%CI 8-12 vs. 5 months, 95%CI 4-6; p = 0.003).<br>Pre- and post-therapeutic FDG PET independently predicts overall survival in patients with HCC undergoing radioembolization. | yes |
| Ma et al. Theranostics 2014                                              | TACE                                     | hepato-cellular carcinoma         | n=27                       | The $\Delta$ T SUVmax%, based on the VOI, had the highest discriminative prognostic value. The OS was significantly better in the PET/CT response group than in the PET/CT non-response group (p=0.025).                                                                                                                                                                                                                                            | yes |
| Kim et al. Nucl Med                                                      | RFA, TACE or ethanol injection           | hepato-cellular                   | n=31                       | By visual analysis, the respective values for sensitivity, specificity, positive predictive value, negative predictive value, and accuracy were 87.5, 71.4, 77.8, 83.3, and 80.0 %. However, there                                                                                                                                                                                                                                                  | no  |

|                                                          |                                 |                                                                        |      |                                                                                                                                                                                                                                                                                                                                                                                                              |     |
|----------------------------------------------------------|---------------------------------|------------------------------------------------------------------------|------|--------------------------------------------------------------------------------------------------------------------------------------------------------------------------------------------------------------------------------------------------------------------------------------------------------------------------------------------------------------------------------------------------------------|-----|
| Mol Imaging 2012                                         |                                 | carcinoma                                                              |      | were no significant differences in the SUVmax and TNR between the two groups.                                                                                                                                                                                                                                                                                                                                |     |
| Paudyal et al. Oncol Rep 2007                            | RFA                             | hepato-cellular carcinoma                                              | n=24 | FDG PET detected recurrence earlier than CT between 4-6 months in 2 patients and between 7-9 months in 6 patients whereas CT was positive in 4 patients. Overall detection rate of recurrence with FDG PET was 92% which was higher than that of CT (75%).                                                                                                                                                   | yes |
| Li et al. Eur J Nucl Med Mol Imaging 2017                | TACE (+/- bevacizumab)          | hepato-cellular carcinoma                                              | n=22 | In patients treated with TACE and placebo, there was a significant difference in mean OS in patients with positive FDG PET as compared with that in patients with negative FDG PET ( $p = 0.048$ ). Although the OS days in patients with positive acetate PET were shorter as compared with those in patients with negative acetate PET, there was no statistically significant difference ( $p = 0.063$ ). | yes |
| Cascales-Campo et al. Transplant Proc 2015               | TACE                            | hepato-cellular carcinoma undergoing orthotopic liver transplantat ion | n=20 | Among patients whose post-TACE SUV decreased to $<3$ , $>70\%$ necrosis was observed upon study of a hepatectomy sample, with a survival rate of 100% and 80% at 1 and 3 years, respectively.                                                                                                                                                                                                                | no  |
| Song et al. Clin Radiol 2015                             | TACE                            | hepato-cellular carcinoma                                              | n=73 | Comparing the receiver-operating characteristic area, (18)F-FDG-PET/CT was found to be superior to CECT for the detection of viable tumour in patients with HCC after TACE ( $p = 0.04$ ). The overall survival rate was significantly higher in the low SUV ratio ( $TSUV_{max}/LSUV_{mean} < 1.65$ ) group ( $p = 0.024$ ).                                                                                | no  |
| Wang et al. J Dig Dis 2013                               | status after surgery and/or RFA | recurrence of hepato-cellular carcinoma                                | n=36 | The sensitivity, specificity of (18) F-FDG-PET/CT for intrahepatic HCC recurrence were 96.7% and 83.3%, respectively. The corresponding values of CEUS were 56.7% and 100%, respectively. The sensitivity and accuracy of (18) F-FDG-PET/CT for the diagnosis of HCC recurrence were significantly higher than those of CEUS ( $P < 0.01$ ).                                                                 | yes |
| <b>indication: radioembolisation in liver metastases</b> |                                 |                                                                        |      |                                                                                                                                                                                                                                                                                                                                                                                                              |     |
| Miller et al. Am J Roentgenol 2007                       | Y-90 micro-spheres              | liver metastases from different primary tumors                         | n=23 | PET detected significantly more responses to treatment (21/33, 63%) than CT using RECIST (2/33, 6%) or combined criteria (8/33, 24%) ( $p < 0.05$ , McNemar test).<br><br>The use of necrosis and size criteria on CT and corrlation with PET may improve the accuracy of assessment of response to 90Y treatment in patients with liver metastases and detect response earlier than standard size criteria. | yes |
| Gulec et al. Eur J Nucl Med Mol                          | Y-90 resin microspheres         | liver metastases from                                                  | n=20 | Pretreatment and posttreatment FTV and TLG showed very strong association with survival. These values can be useful quantitative criteria for patient selection and disease prognostication when (90)Y SIRT is contemplated in patients with CRCLM.                                                                                                                                                          | yes |

|                                               |                   |                                             |      |                                                                                                                                                                                                                                                                                                                                                                                                                                             |     |
|-----------------------------------------------|-------------------|---------------------------------------------|------|---------------------------------------------------------------------------------------------------------------------------------------------------------------------------------------------------------------------------------------------------------------------------------------------------------------------------------------------------------------------------------------------------------------------------------------------|-----|
| Imaging 2011                                  |                   | colorectal cancer                           |      |                                                                                                                                                                                                                                                                                                                                                                                                                                             |     |
| Sabet et al. Eur J Nucl Med Mol Imaging 2015  | Y-90 microspheres | liver dominant metastatic colorectal cancer | n=51 | The median OS after RE was 7 months [95 % confidence interval (CI) 5-8]; early metabolic responders (n = 33) survived longer than non-responders (p < 0.001) with a median OS of 10 months (95 % CI 3-16) versus 4 months (95 % CI 2-6). Molecular response assessment in CRC using (18)F-FDG PET/CT appears feasible as early as 4 weeks post-RE.                                                                                          | yes |
| Kalva et al. Am J Clin Oncol 2017             | Y-90 microspheres | liver metastases from colorectal cancer     | n=45 | Per RECIST, 1 patient (2%) had partial response, 34 (71%) had stable disease, and 6 (13%) had progressive disease. PET response was seen in 46% of patients with 2 patients (4%) demonstrating complete and 22 (42%) demonstrating partial metabolic response. The median survival was 186 days (95% CI, 149-277 d). Response on PET was the only independent predictor of superior overall survival.                                       | no  |
| Fendler et al. J Nucl Med 2013                | Y-90 microspheres | liver metastases from colorectal cancer     | n=80 | Responders who had a change in metabolic volume or total lesion glycolysis had significantly longer survival (92 vs. 49 wk [P = 0.006] and 91 vs. 48 wk [P = 0.025], respectively). However, neither RECIST 1.1 criteria nor changes in SUV(peak) or SUV(max) after treatment predicted outcome (P = 0.086 for RECIST; P = 0.310 for change in SUV(peak); P = 0.155 for change in SUV(max)).                                                | yes |
| Fendler et al. J Nucl Med 2016                | Y-90 microspheres | liver metastases from breast cancer         | n=81 | Twenty-nine of 56 (52%) patients responded to radioembolization based on FDG PET criteria.                                                                                                                                                                                                                                                                                                                                                  | yes |
| Haug et al. J Nucl Med 2012                   | Y-90 microspheres | liver metastases from breast cancer         | n=58 | Response as assessed with SUV(max) correlated significantly with survival after radioembolization, with responders having significantly longer survival (65 wk) than nonresponders (43 wk; P < 0.05). The change in SUV(max) as assessed by (18)F-FDG PET/CT before and 3 mo after SIRT was identified as the only independent predictor of survival in patients with hepatic metastases of breast cancer.                                  | no  |
| Michl et al. J Nucl Med 2016                  | Y-90 microspheres | liver metastases from pancreatic cancer     | n=17 | Metabolic response by change in SUVpeak (7/17) and change in total-lesion glycolysis (7/17) was a predictor for overall survival (P = 0.039; hazard ratio [HR], 0.24; 95% confidence interval [CI], 0.06-0.93), progression-free survival (P = 0.016; HR, 0.15; 95% CI, 0.03-0.69), and time to intrahepatic progression (P = 0.010; HR, 0.16; 95% CI, 0.04-0.65). Summed CT diameter did not predict overall or progression free survival. | yes |
| Sofocleous et al. Clin Colorectal Cancer 2014 | Y-90 microspheres | liver metastases from colorectal cancer     | n=19 | Responses by RECIST, PERCIST, and CEA were, respectively, 0%, 20%, and 32% at 4 to 8 weeks and 5%, 33%, and 21% at 3 to 4 months post SIRT; 53% of patients had stable disease (by RECIST) at 3 to 4 months.                                                                                                                                                                                                                                | yes |

|                                                |                   |                                                |      |                                                                                                                                                                                                                                                                                                           |     |
|------------------------------------------------|-------------------|------------------------------------------------|------|-----------------------------------------------------------------------------------------------------------------------------------------------------------------------------------------------------------------------------------------------------------------------------------------------------------|-----|
| Sofocleous et al. Clin Colorectal Cancer 2015  | Y-90 microspheres | liver metastases from colorectal cancer        | n=53 | Evaluation using PERCIST was more likely than RECIST to document response or progression compared with the baseline assessment before RE.                                                                                                                                                                 | no  |
| Szysko et al. Nucl Med Commun 2007             | Y-90 microspheres | liver metastases different primary tumors      | n=21 | FDG PET imaging is more sensitive than CT in the assessment of early response to SIR spheres, allowing clinicians to proceed with further therapeutic options.                                                                                                                                            | yes |
| Zerizer et al. Eur J Nucl Med Mol Imaging 2012 | Y-90 microspheres | liver metastases from colorectal cancer        | n=25 | The responses on the FDG PET/CT studies were highly correlated with the responses of tumor markers. The responses on (18)F-FDG PET/CT studies also significantly predicted PFS, while RECIST and tumor density did not.                                                                                   | yes |
| Bagni et al. Cancer Biother Radiopharm 2015    | Y-90 microspheres | liver metastases from breast cancer            | n=17 | Subjects with a $\Delta$ TLG >50% and $\Delta$ TLG <50% had a mean OS of $16.4 \pm 0.6$ and $10.3 \pm 0.4$ months, respectively ( $p < 0.001$ ). Cox regression analysis demonstrated hepatic tumor load ( $p = 0.048$ ) and $\Delta$ TLG as the only significant ( $p = 0.005$ ) predictors of survival. | yes |
| Barabasch et al. Invest Radiol 2015            | Y-90 microspheres | liver metastases from different primary tumors | n=35 | Diffusion-weighted magnetic resonance imaging appears superior to PET/CT for early response assessment in patients with hepatic metastases of common solid tumors.                                                                                                                                        | yes |
| Kucuk et al. Worl J Surg Oncol 2011            | Y-90 microspheres | liver metastases from different primary tumors | n=78 | In the evaluation of treatment response; 43(55%) patients were responder (R) and 35 (45%) patients were non-responder (NR) in the sixth week F18-FDG PET/CT. FDG PET/CT is seen to be a successful imaging method in evaluating treatment response for predicting survival times in this patient group.   | yes |
| Willowson et al. EJNMMI res 2017               | Y-90 microspheres | Liver metastases from colorectal cancer        | n=22 | Early reduction in TLG at follow-up may be prognostic for overall survival.                                                                                                                                                                                                                               | yes |



|                                                                     |                        |                                                     |      |                                                                                                                                                                                                                                                                                                                                                |     |
|---------------------------------------------------------------------|------------------------|-----------------------------------------------------|------|------------------------------------------------------------------------------------------------------------------------------------------------------------------------------------------------------------------------------------------------------------------------------------------------------------------------------------------------|-----|
| Edalat et al.<br>Clin Nucl<br>Med 2016                              | Y-90 micro-<br>spheres | liver<br>metastases<br>colorectal<br>cancer         | n=16 | After Y-90 microspheres, $\Delta$ SAM showed an objective response rate of 40%. Median overall survival (OS) of the cohort after Y was 9.2 months (CI 95% 2.2-16.2). Patients demonstrating objective response based on $\Delta$ SAM had a median OS of 22.7 months (CI 95% 12.4-33.0) vs. 6.7 (CI 95% 4.2-9.2) in non-responders (P = 0.007). | no  |
| Shady et al.<br>Eur J Rad<br>2016                                   | Y-90 micro-<br>spheres | Liver<br>metastases<br>from<br>colorectal<br>cancer | n=49 | Metabolic response based on changes in MTV and TLG can predict OS post-radioembolisation of colorectal liver metastases.                                                                                                                                                                                                                       | yes |
| Shady et al.<br>AJR 2016                                            | Y-90 micro-<br>spheres | Liver<br>metastases<br>from<br>colorectal<br>cancer | n=25 | EORTC PET criteria, Choi criteria, and tumor attenuation criteria appear to be equally reliable surrogate imaging biomarkers of liver PFS after radioembolisation in patients with liver metastases from colorectal cancer.                                                                                                                    | yes |
| <b>indication: radioembolisation in cholangiocellular carcinoma</b> |                        |                                                     |      |                                                                                                                                                                                                                                                                                                                                                |     |
| Haug et al.<br>Eur J Nucl<br>Med Mol<br>Imaging 2011                | Y-90 micro-<br>spheres | intrahepatic<br>cholangio-<br>cellular<br>carcinoma | n=26 | The change in all FDG values significantly predicted survival by Kaplan-Meier analysis after radioembolisation.                                                                                                                                                                                                                                | yes |
| Filippi et al.<br>Nucl Med<br>Biol 2015                             | Y-90 micro-<br>spheres | intrahepatic<br>cholangio-<br>cellular<br>carcinoma | n=17 | A decrease in total lesion glycolysis (TLG) of >50% within 6 weeks after treatment is significantly associated with both longer time-to-progression (36.9 versus 13.7 weeks) as well as improved overall survival (79.6 versus 43.1 weeks)                                                                                                     | yes |

| <b>TABLE 5.</b> Evaluation of included studies according to QUADAS criteria             |                             |            |                         |                                                            |                                        |            |                    |              |
|-----------------------------------------------------------------------------------------|-----------------------------|------------|-------------------------|------------------------------------------------------------|----------------------------------------|------------|--------------------|--------------|
|                                                                                         | <b>Risk of bias</b>         |            |                         |                                                            | <b>Applicability concerns</b>          |            |                    | criteria met |
|                                                                                         | Patient selection           | Index test | Reference standard      | Flow and timing                                            | Patient selection                      | Index test | Reference standard |              |
| <b><i>studies with imaging &lt;48 hours to evaluate technical treatment success</i></b> |                             |            |                         |                                                            |                                        |            |                    |              |
| Cornelis et al. J Nucl Med 2016                                                         |                             |            |                         |                                                            | <25 patients, different primary tumors |            |                    | yes          |
| VandenBroucke et al. J Vasc Interv Radiol 2014                                          |                             |            |                         | Short follow-up (8-10 weeks)                               | <25 patients                           |            |                    | yes          |
| Kuehl et al. Clin Oncol 2008                                                            |                             |            |                         | Not all patients received a PET-CT shortly after treatment |                                        |            |                    | yes          |
| Kuehl et al. Eur J Radiol 2008                                                          |                             |            |                         |                                                            | <25 patients                           |            |                    | yes          |
| Ryan et al. Radiology 2013                                                              |                             |            |                         |                                                            | <25 patients, different primary tumors |            |                    | yes          |
| <b><i>indication: RFA and cryoablation in liver metastases</i></b>                      |                             |            |                         |                                                            |                                        |            |                    |              |
| Joosten et al. Eur J Surg Oncol 2005                                                    | 43/58 of patients had a PET |            |                         |                                                            |                                        |            |                    | yes          |
| Langenhoff et al. J Clin Oncol 2002                                                     |                             |            |                         |                                                            | <25 patients                           |            |                    | yes          |
| Donckier et al. J Surg Oncol 2003                                                       |                             |            |                         |                                                            | <25 patients                           |            |                    | yes          |
| Chen et al. Ann Nucl Med 2013                                                           |                             |            |                         | Wide range of imaging time points (<8 weeks)               |                                        |            |                    | yes          |
| Nielsen et al. Eur J Radiol 2013                                                        |                             |            | Follow-up not specified | Wide range of imaging time points                          |                                        |            |                    | no           |
| Sahin et al.                                                                            |                             |            |                         |                                                            | compares                               |            |                    | no           |

|                                                  |                                     |  |                                           |                                                                           |                                                                                    |  |  |     |
|--------------------------------------------------|-------------------------------------|--|-------------------------------------------|---------------------------------------------------------------------------|------------------------------------------------------------------------------------|--|--|-----|
| Ann Surg Oncol 2012                              |                                     |  |                                           |                                                                           | survival with and without PET                                                      |  |  |     |
| <b>indication: RFA for lung lesions</b>          |                                     |  |                                           |                                                                           |                                                                                    |  |  |     |
| Yoo et al. Am J Roentgenol 2011                  |                                     |  |                                           | Long interval (6 months) after intervention                               |                                                                                    |  |  | yes |
| LaFuente et al. Rev Esp Med Nucl Imagen Mol 2016 |                                     |  | Unclear how local recurrence was objected |                                                                           | <25 patients                                                                       |  |  | no  |
| Deandreis et al. Radiology 2011                  |                                     |  |                                           |                                                                           |                                                                                    |  |  | yes |
| Higuchi et al. J Cancer Res Clin Oncol 2014      |                                     |  |                                           |                                                                           | <25 patients                                                                       |  |  | yes |
| Higaki et al. Ann Nucl Med 2008                  |                                     |  |                                           | Wide range of imaging time points (1-3 months, 3-6 months and 6-9 months) | <25 patients                                                                       |  |  | yes |
| Alafate et al. Acta Med Okayama 2013             |                                     |  |                                           |                                                                           | <25 patients, exclusion of patients with local recurrence or adjuvant chemotherapy |  |  | no  |
| Wang et al. Int J Clin Exp Med 2015              |                                     |  |                                           |                                                                           |                                                                                    |  |  | yes |
| Bonichon et al. Eur J Nucl Med Mol Imaging 2013  |                                     |  |                                           |                                                                           |                                                                                    |  |  | yes |
| Singnurkar et al. J Nucl Med 2010                | 12/68 patients inadequate follow-up |  |                                           | Wide range of imaging time points (1-4 months)                            |                                                                                    |  |  | no  |

|                                                                          |  |                                               |  |                                                                                    |                                                                     |  |  |     |
|--------------------------------------------------------------------------|--|-----------------------------------------------|--|------------------------------------------------------------------------------------|---------------------------------------------------------------------|--|--|-----|
|                                                                          |  |                                               |  |                                                                                    |                                                                     |  |  |     |
| Suzawa et al. Clin Nucl Med 2013                                         |  | Unclear if reviewers were blinded for outcome |  |                                                                                    |                                                                     |  |  | yes |
| LoGiurato et al. 2015                                                    |  | Cut-off value was not predefined              |  |                                                                                    |                                                                     |  |  | yes |
| <b>indication: regional ablative therapy in hepatocellular carcinoma</b> |  |                                               |  |                                                                                    |                                                                     |  |  |     |
| Higashi et al. Eur J Nucl Med Mol Imaging 2010                           |  |                                               |  |                                                                                    | Various interventions and some patients received systemic treatment |  |  | no  |
| Sabet et al. Nuklearmedizin 2014                                         |  |                                               |  |                                                                                    |                                                                     |  |  |     |
| Ma et al. 2014                                                           |  | Many parameters tested in a small sample size |  |                                                                                    |                                                                     |  |  | yes |
| Kim et al. Nucl Med Mol Imaging 2012                                     |  |                                               |  | Short follow-up (6 months)                                                         | Small population with various interventions                         |  |  | no  |
| Paudyal et al. Oncol Rep 2007                                            |  |                                               |  |                                                                                    | <25 patients                                                        |  |  | yes |
| Li et al. Eur J Nucl Med Mol Imaging 2017                                |  |                                               |  |                                                                                    | <25 patients                                                        |  |  | yes |
| Cascales-Campos et al. Transplant Proc 2015                              |  |                                               |  | Time point after intervention not specified. <8 weeks before liver transplantation | <25 patients                                                        |  |  | no  |
| Song et al. Clin Radiol 2015                                             |  | Cut-off value was not predefined              |  | Wide range of imaging time points                                                  |                                                                     |  |  | no  |
| Wang et al. J Dig Dis 2013                                               |  |                                               |  |                                                                                    | Follow-up with PET on                                               |  |  | yes |

|                                                          |                                               |                                  |  |                                                                   | indication                                                  |  |  |     |
|----------------------------------------------------------|-----------------------------------------------|----------------------------------|--|-------------------------------------------------------------------|-------------------------------------------------------------|--|--|-----|
| <b>indication: radioembolisation in liver metastases</b> |                                               |                                  |  |                                                                   |                                                             |  |  |     |
| Miller et al. 2007                                       |                                               |                                  |  | Short follow-up (mean 101 days)                                   |                                                             |  |  | yes |
| Gulec et al. Eur J Nucl Med Mol Imaging 2011             |                                               |                                  |  |                                                                   | <25 patients, Response evaluation not primary research goal |  |  | yes |
| Sabet et al. Eur J Nucl Med Mol Imaging 2015             |                                               |                                  |  |                                                                   |                                                             |  |  | yes |
| Kalva et al. Am J Clin                                   |                                               | Cut-off value was not predefined |  |                                                                   | Response evaluation not primary research goal               |  |  | no  |
| Fendler et al. J Nucl Med 2013                           |                                               |                                  |  |                                                                   |                                                             |  |  | yes |
| Fendler et al. J Nucl Med 2016                           |                                               |                                  |  |                                                                   |                                                             |  |  | yes |
| Michl et al. J Nucl Med 2016                             |                                               |                                  |  |                                                                   | <25 patients                                                |  |  |     |
| Haug et al. J Nucl Med 2012                              | 43/58 of patients had a PET-CT                |                                  |  | Long (3 months) interval between intervention and imaging         |                                                             |  |  | no  |
| Sofocleous et al. Clin colorectal cancer 2014            | Small group of patients, divided in 3 cohorts |                                  |  |                                                                   | <25 patients                                                |  |  | yes |
| Sofocleous et al. Clin colorectal cancer 2015            |                                               |                                  |  | 64% had additional therapies during follow-up/response evaluation |                                                             |  |  | no  |
| Szysko et al. Nuc Med Comm 2007                          |                                               |                                  |  | Only 14/21 patients had a PET-CT after 6 weeks                    | <25 patients                                                |  |  | yes |
| Zerizer et al.                                           |                                               |                                  |  |                                                                   |                                                             |  |  | yes |

|                                                                            |  |  |  |                                                       |                                        |  |  |     |
|----------------------------------------------------------------------------|--|--|--|-------------------------------------------------------|----------------------------------------|--|--|-----|
| Eur J Nucl Med Mol Imaging 2012                                            |  |  |  |                                                       |                                        |  |  |     |
| Bagni et al. Cancer Biother Radiopharm 2015                                |  |  |  | Range of imaging time points < 6 weeks                | <25 patients                           |  |  | yes |
| Barabasch et al. Invest Radiol 2015                                        |  |  |  |                                                       |                                        |  |  | yes |
| Kucuk et al. World J Surg Oncol 2011                                       |  |  |  | Different primary tumors                              |                                        |  |  | yes |
| Willowson et al. EJNMMI res 2017                                           |  |  |  |                                                       | <25 patients                           |  |  | yes |
| Edalat et al. Clin Nucl Med 2016                                           |  |  |  | Interval between intervention and PET not specified   | <25 patients                           |  |  | no  |
| Shady et al. AJR 2016                                                      |  |  |  |                                                       | <25 patients, different primary tumors |  |  | yes |
| Shady et al. Eur J Rad 2016                                                |  |  |  | Wide range of imaging time point (between 3-11 weeks) |                                        |  |  | yes |
| <b><i>indication: radioembolisation in cholangiocellular carcinoma</i></b> |  |  |  |                                                       |                                        |  |  |     |
| Haug et al. Eur J Nucl Med Mol Imaging 2011                                |  |  |  |                                                       |                                        |  |  | yes |
| Filippi et al. Nuc Med Biol 2015                                           |  |  |  |                                                       | <25 patients                           |  |  | yes |

Studies with no or one minor comment (indicated in orange) are discussed in the text.
